# Supplementary material for: Low and Consistent Asymmetry Parameters in Arctic and Mid-latitude Cirrus
Source: Copernicus journal article supplement (doi:10.5194/egusphere-2025-3065), 2025-07-14
Supplement: Supplementary file 1 [file egusphere-2025-3065-supplement.pdf]

# Supplementary Material for: Low and Consistent Asymmetry Parameters in Arctic and Mid-latitude Cirrus

Emma Järvinen & Franz M. Schnaiter

## Supplementary Figures

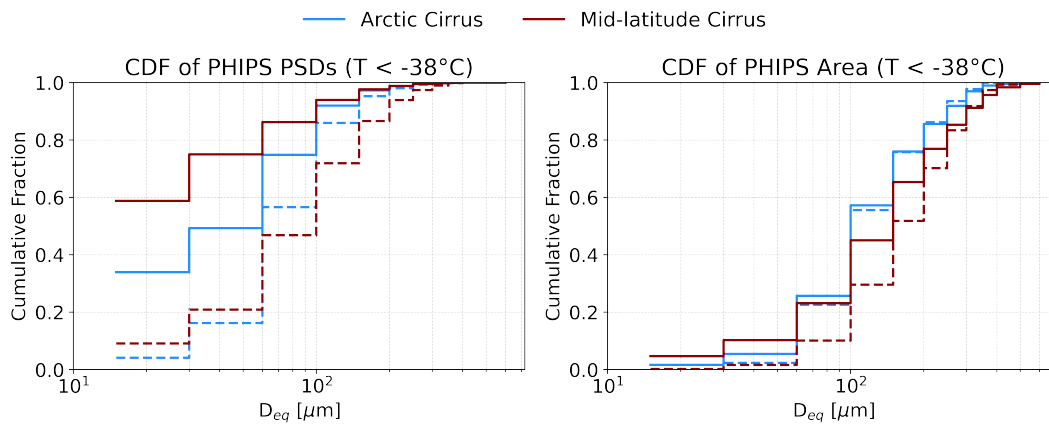

Figure S1: Cumulative particle number and area size distributions for Arctic and mid-latitude cirrus clouds as observed by PHIPS under conditions of  $T < -38^{\circ}\text{C}$  and  $\text{IWC} > 10^{-5} \text{ g/m}^3$ . Solid lines show the mean of all 1-Hz particle size distributions (PSD) and area distributions fulfilling the conditions, while dashed lines represent shattering-corrected values based on imaged and manually classified particles. Arctic cirrus distributions are shown in blue, mid-latitude cirrus in red. The distributions are normalised to a cumulative fraction of 1.

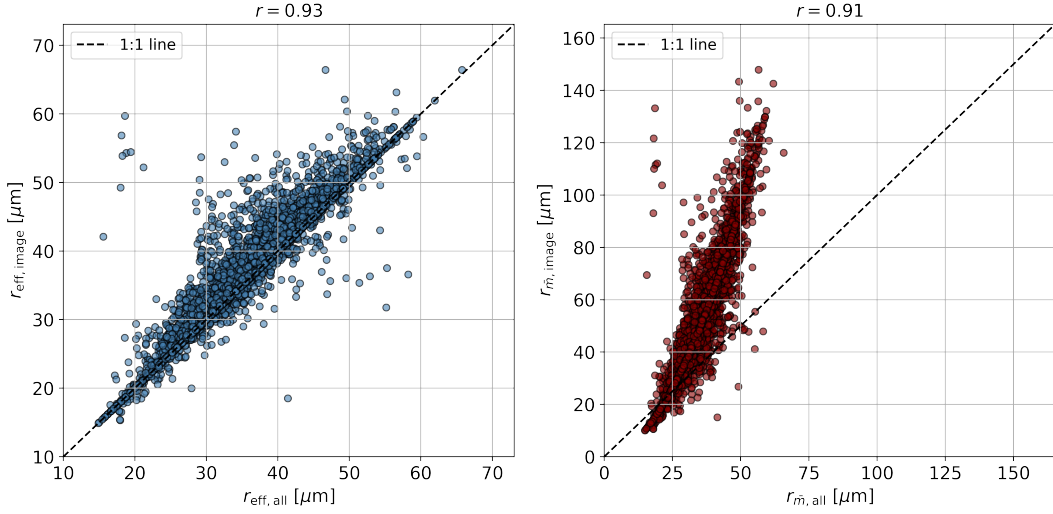

Figure S2: Comparison of effective radius ( $r_{\text{eff}}$ , left) and mass-equivalent spherical radius ( $r_{\bar{m}}$ , right) derived from all triggered particles (all) and from manually classified intact particles (image). The 1:1 dashed line indicates perfect agreement. The effective radius shows a strong correlation between the two datasets ( $r = 0.93$ ) and a good agreement, while the mass-equivalent spherical radius exhibits also a strong correlation ( $r = 0.91$ ), but a significant deviation from the 1:1 line, reflecting the higher sensitivity of  $r_{\bar{m}}$  to shattering artefacts in the full dataset.

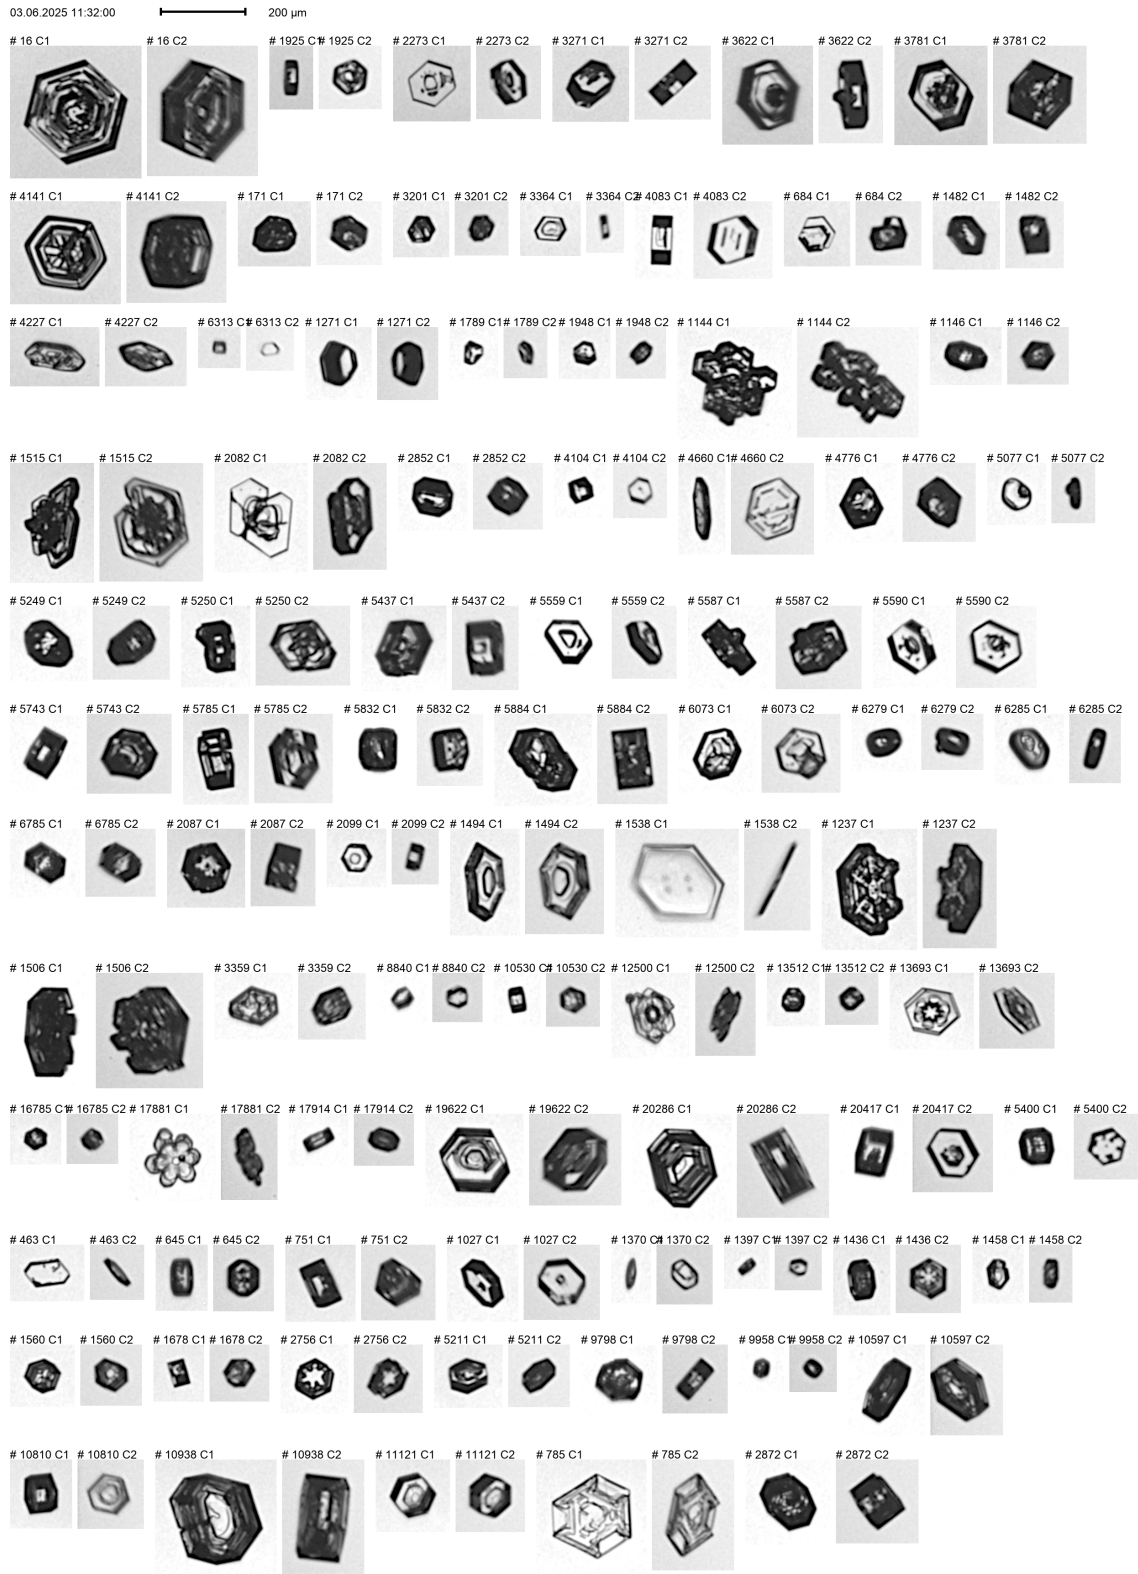

Figure S3: Stereo-image examples of ice crystals classified as plates.

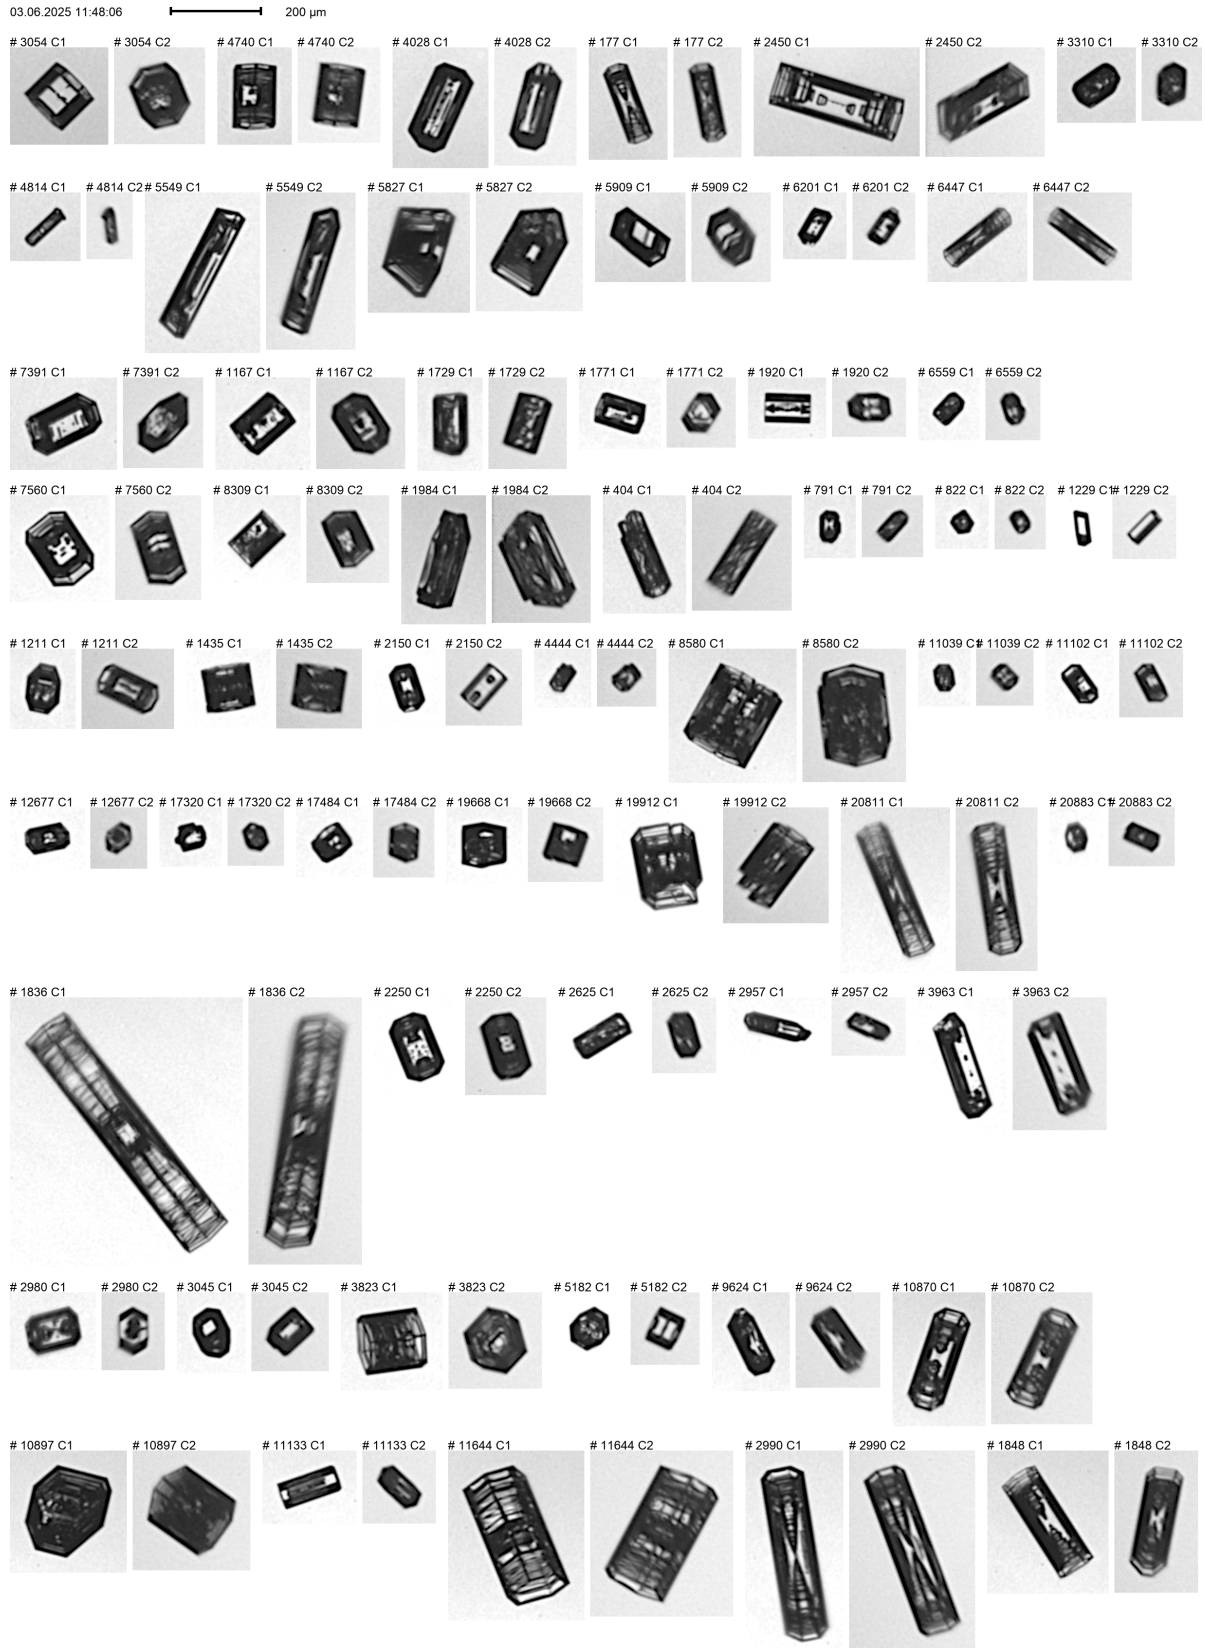

Figure S4: Stereo-image examples of ice crystals classified as column.



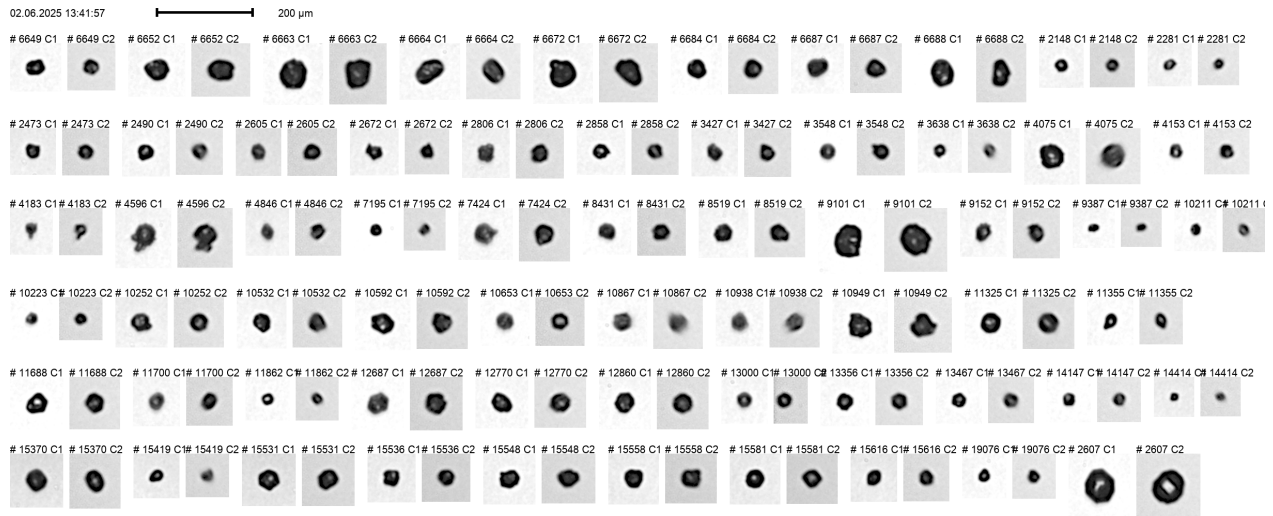

Figure S5: Stereo-image examples of ice crystals classified as single frozen droplet.

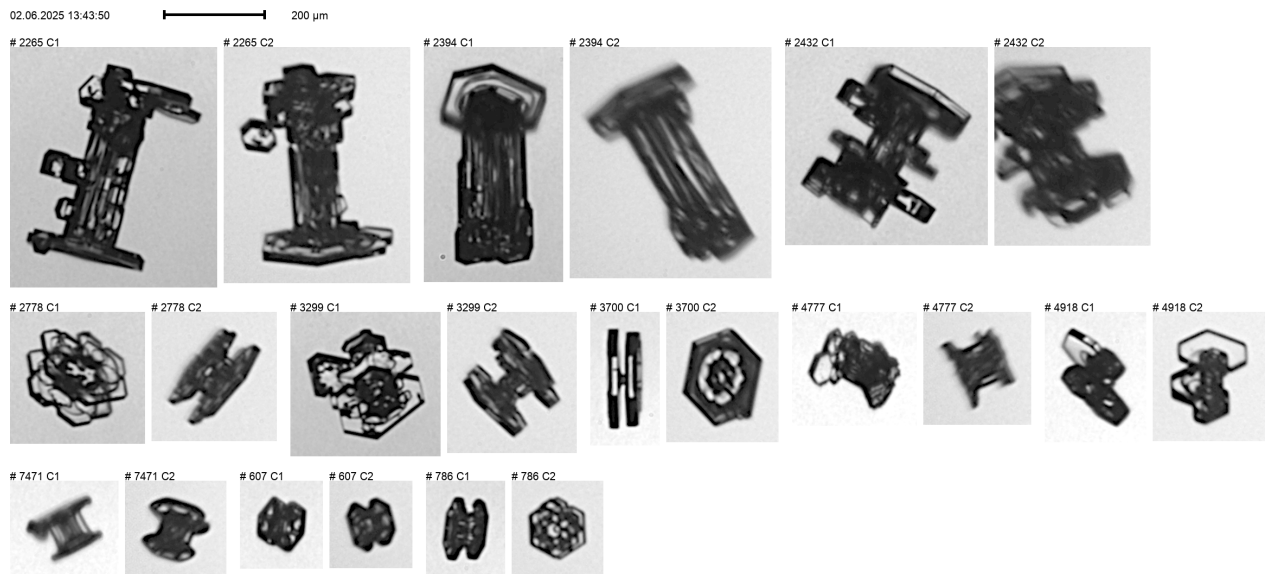

Figure S6: Stereo-image examples of ice crystals classified as capped column.

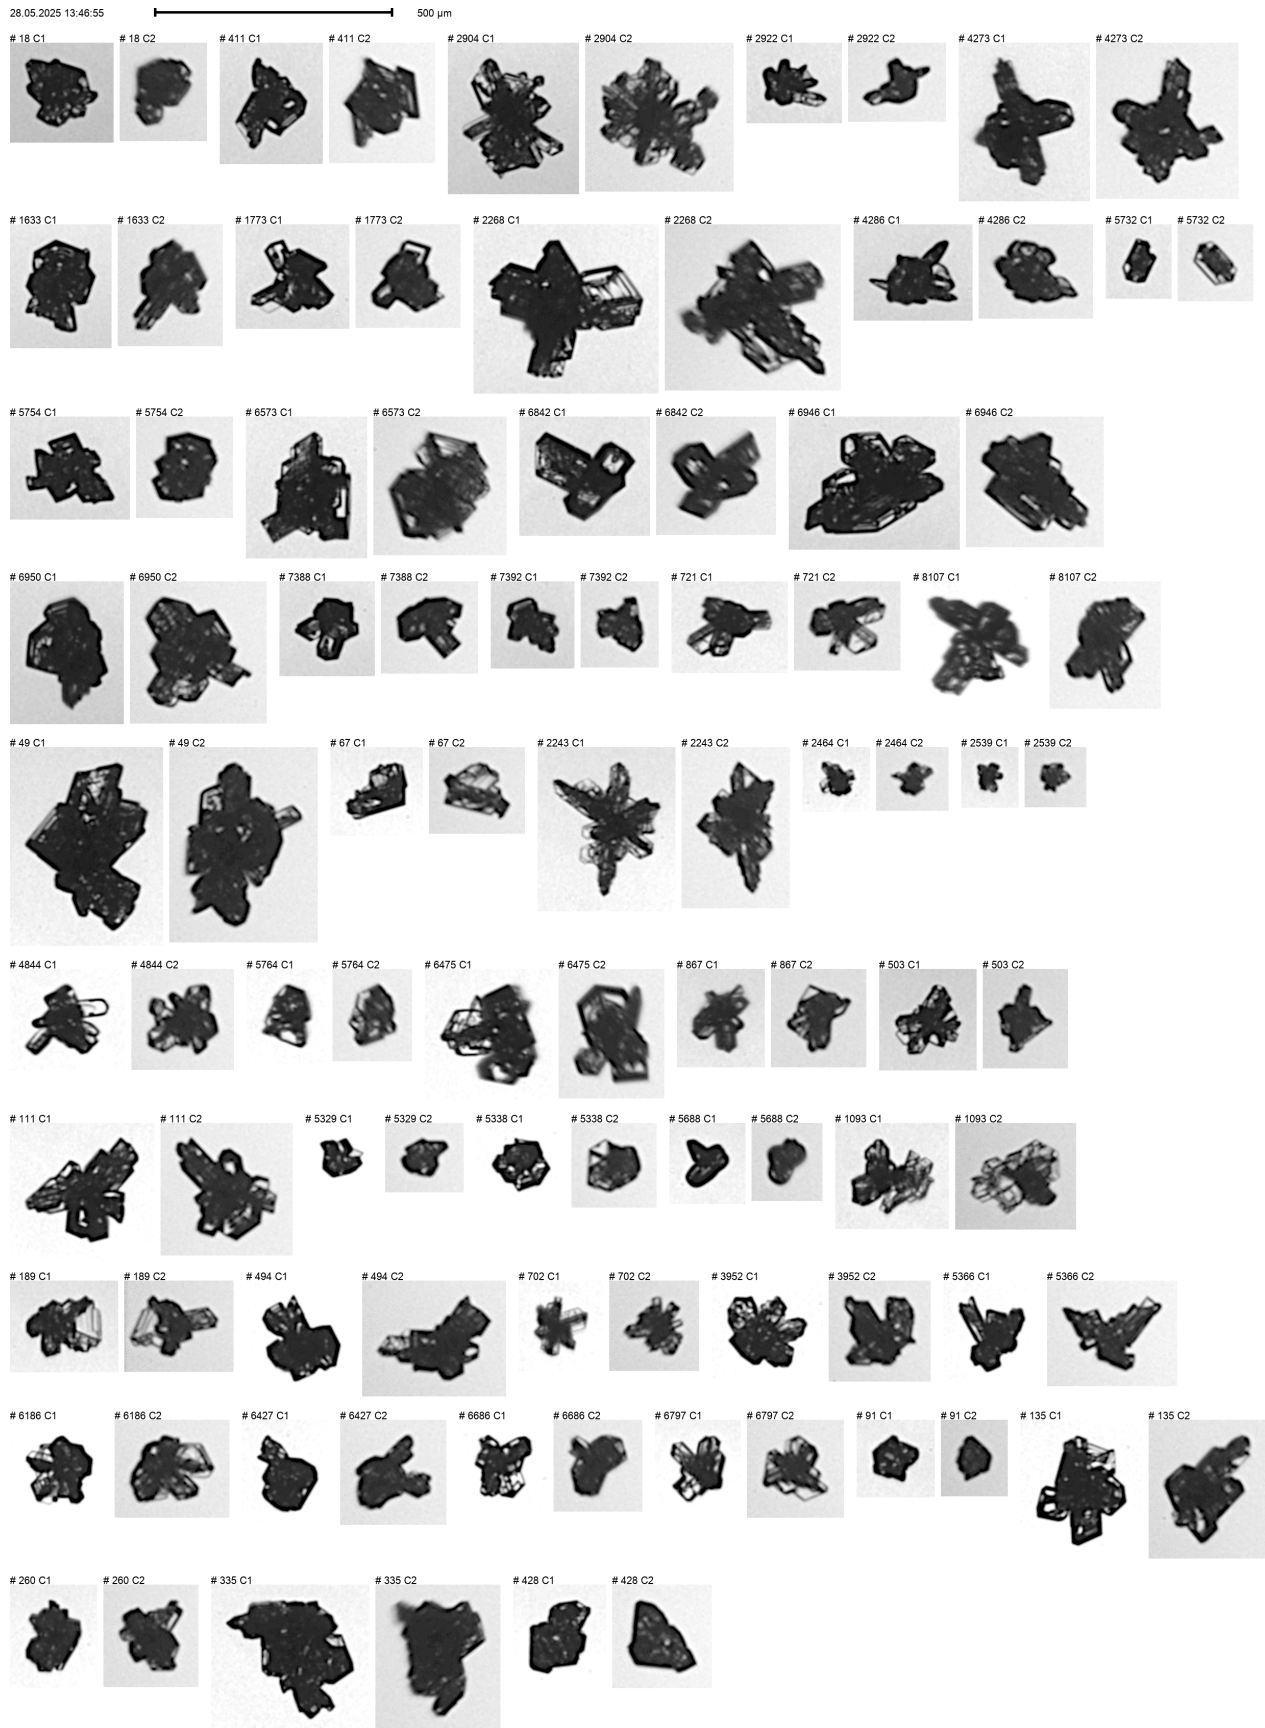

Figure S7: Stereo-image examples of ice crystals classified as side planes.

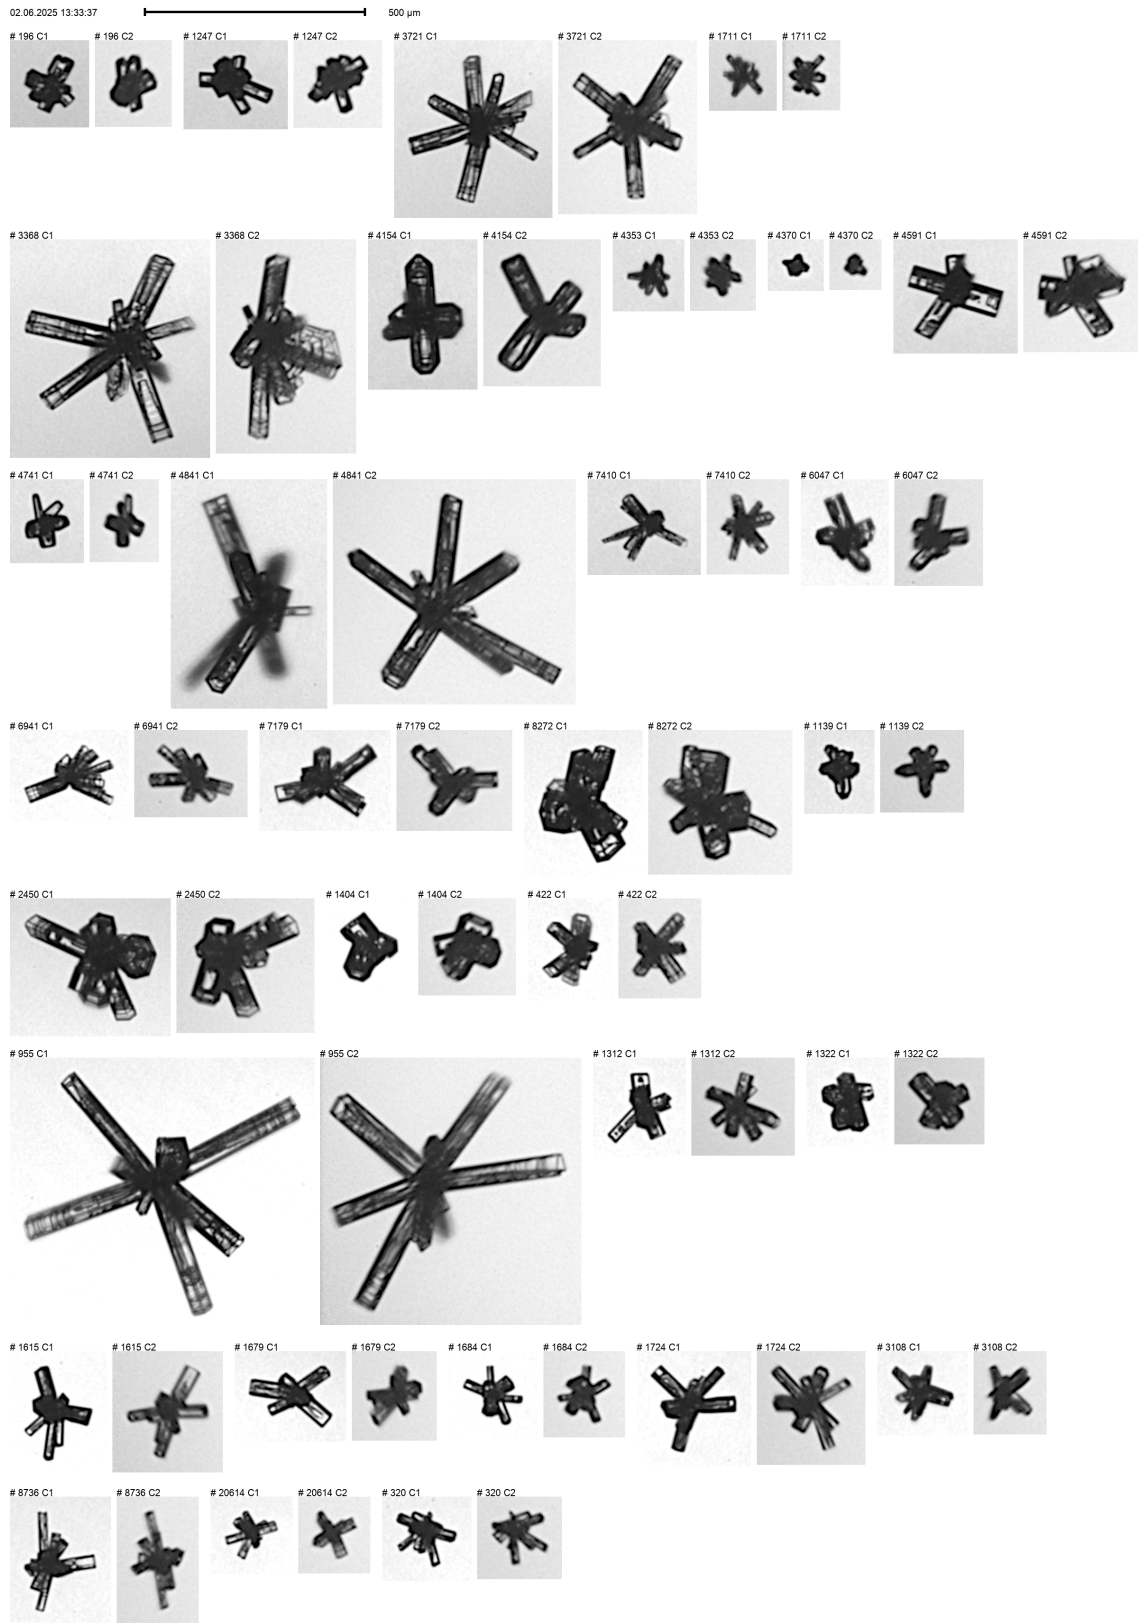

Figure S8: Stereo-image examples of ice crystals classified as bullet rosettes.

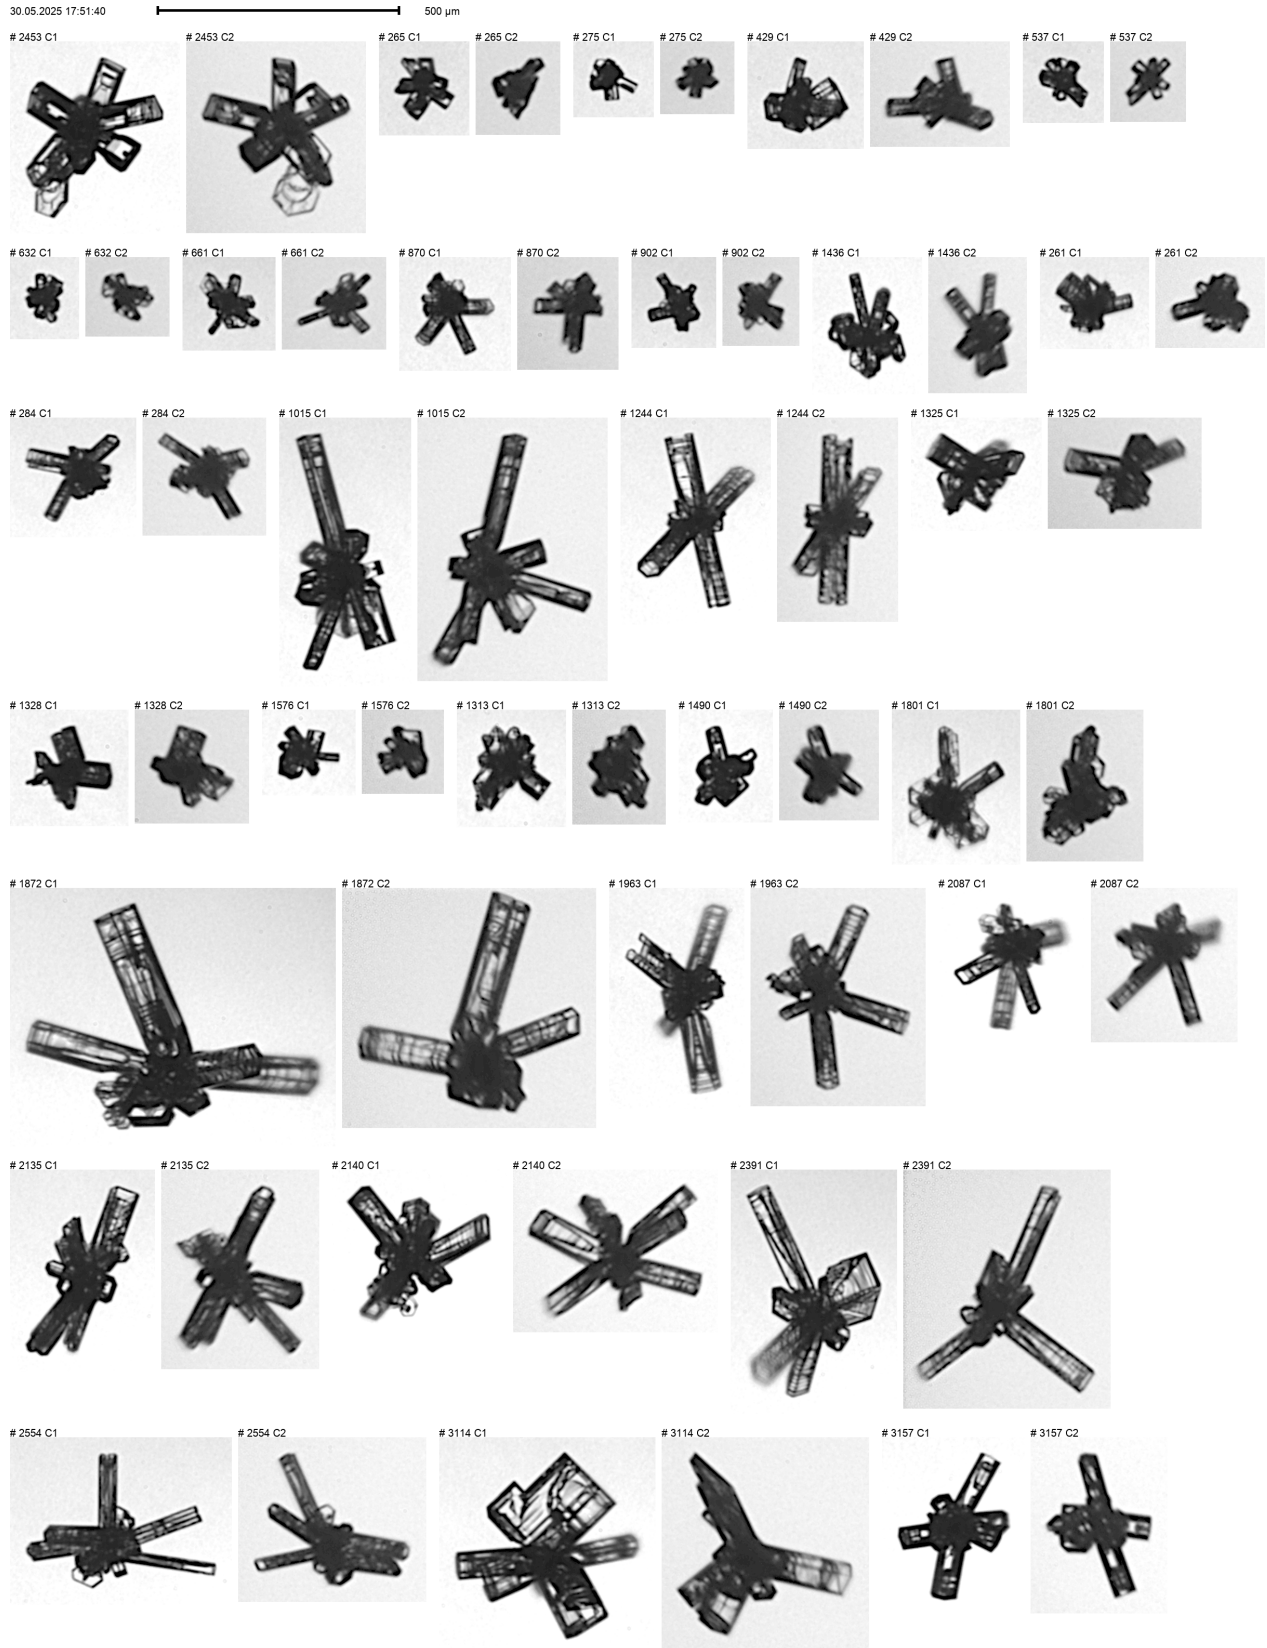

Figure S9: Stereo-image examples of ice crystals classified as mixed rosettes.

03.06.2025 10:54:59

500  $\mu\text{m}$

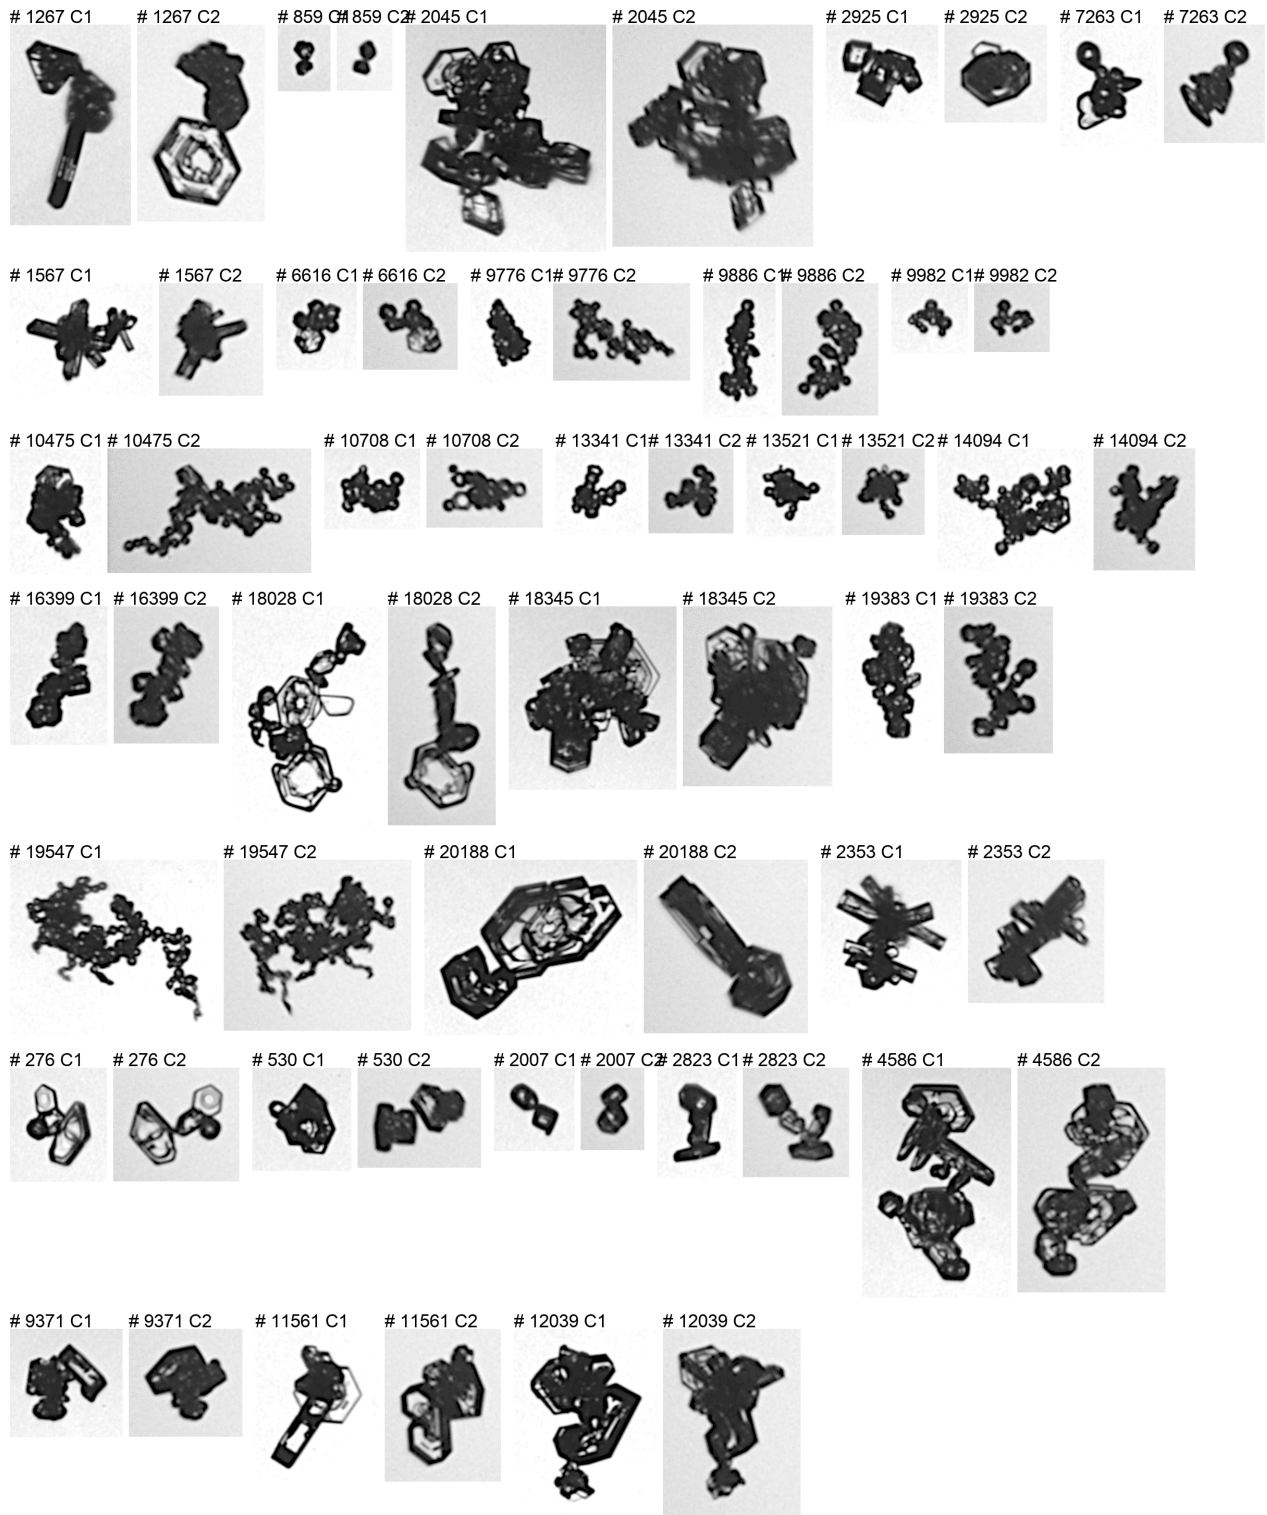

Figure S10: Stereo-image examples of ice crystals classified as aggregates.

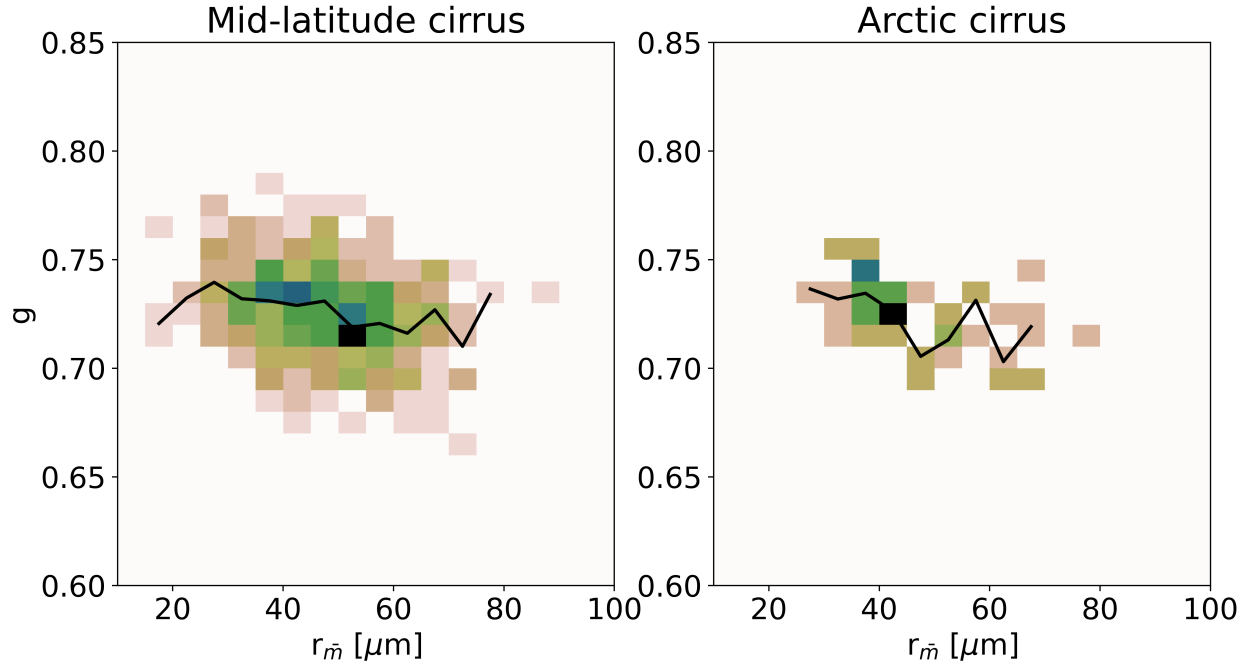

Figure S11: Frequency distribution of asymmetry parameter ( $g$ ) observations as a function of the mass-equivalent spherical radius ( $r_{\bar{m}}$ ). Both the asymmetry parameter and  $r_{\bar{m}}$  are retrieved only for particles with stereo-microscopic image that were not classified as shattering. The black line indicated the median value for the effective radius bins with a bin width of 5  $\mu\text{m}$ .
